# Supplementary material
Source: PubMed Central journal article supplement (PMC5685894)
Supplement: NIHMS903039-supplement-S1.pdf [file NIHMS903039-supplement-S1.pdf]

DESCRIPTION: The supplementary file is a PDF containing additional experimental results.

SIZE: 2.13 MB

PLAYER INFORMATION: PDF Reader

PACKING LIST: SupplementaryMaterials.pdf

CONTACT INFORMATION:

Dinggang Shen

UNC at Chapel Hill, Chapel Hill, NC, USA

E-mail: [dgshen@med.unc.edu](mailto:dgshen@med.unc.edu).
